# Supplementary figures and images for: A National Study of Nutrition and Nutritional Status of the Adult Polish Population in the Years 2017–2020 before and during the COVID-19 Pandemic—Design and Methods
Source: MDPI journal article supplement (doi:10.3390/nu13082568), 2021-07-27

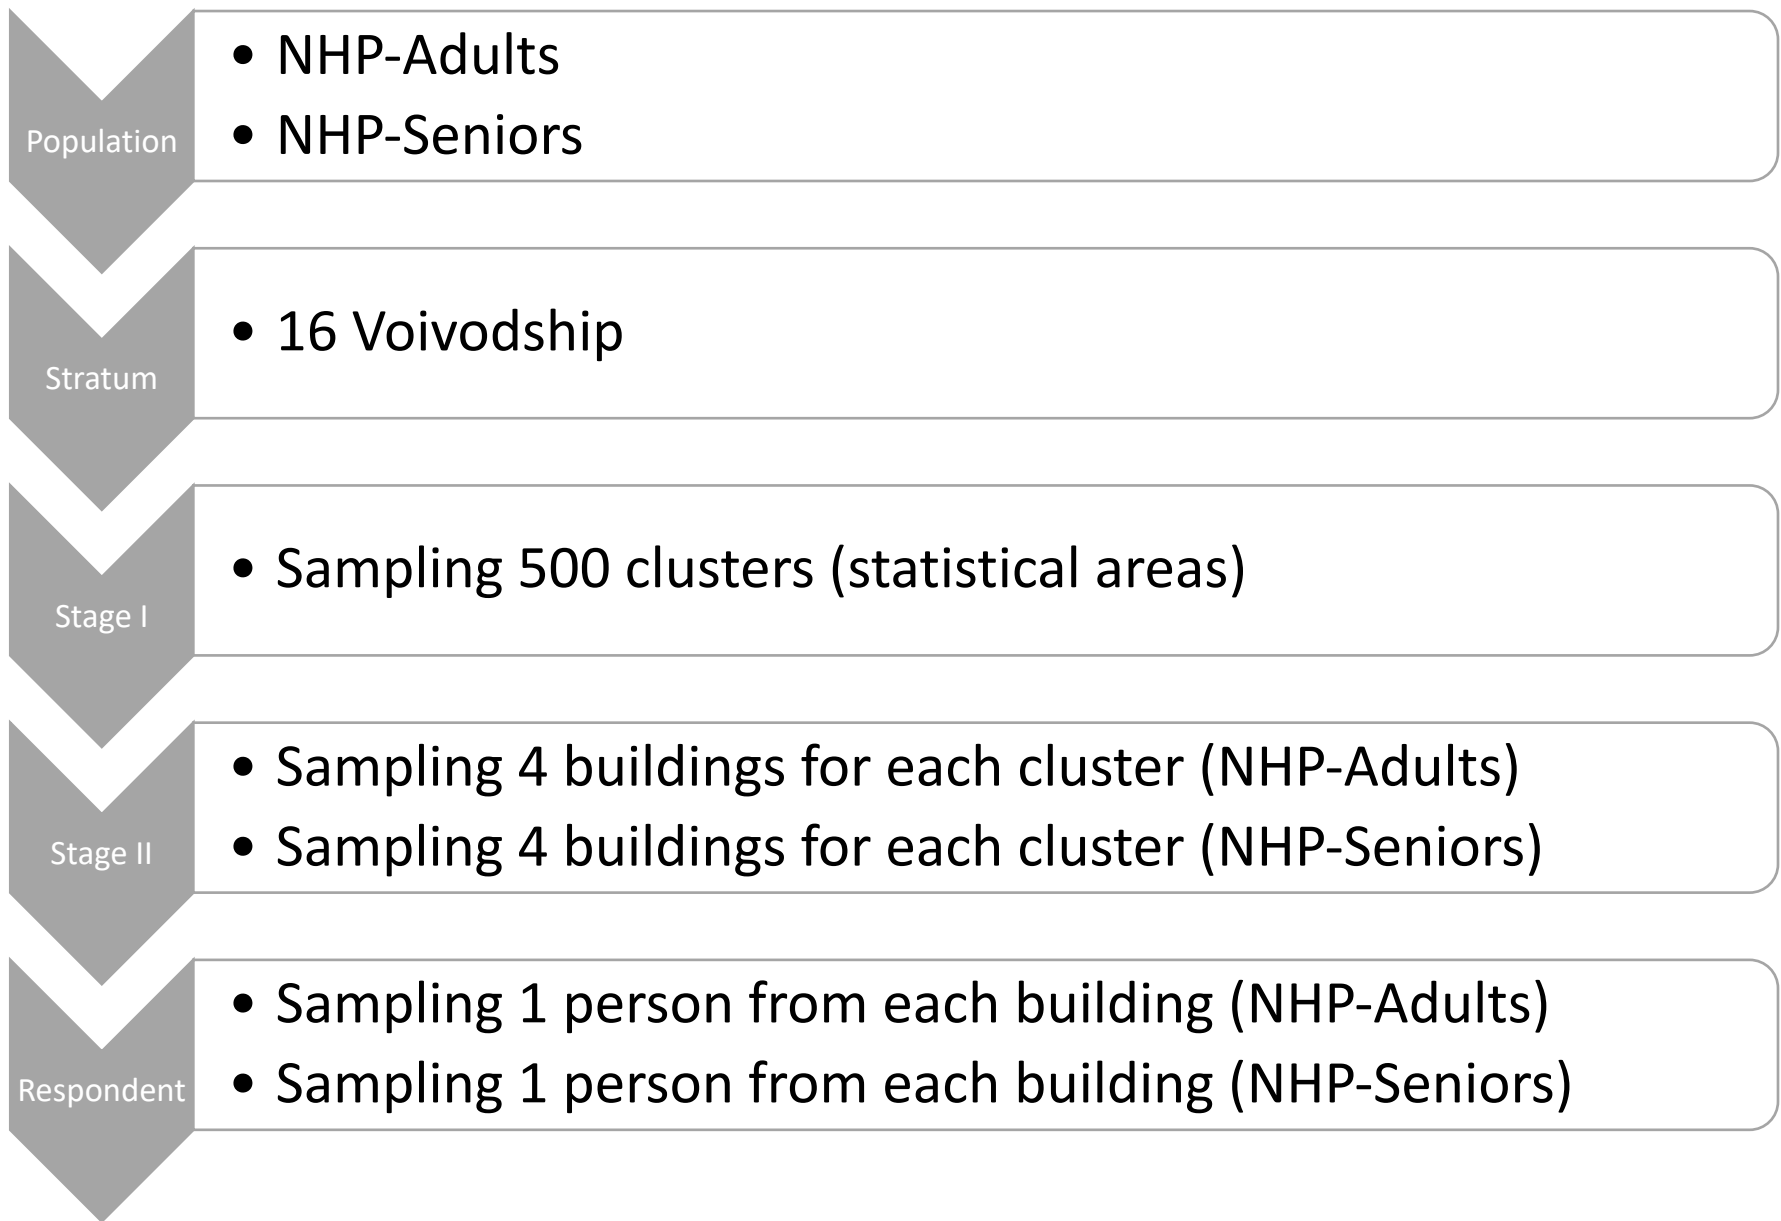

Figure S1: CAPI sampling methodology

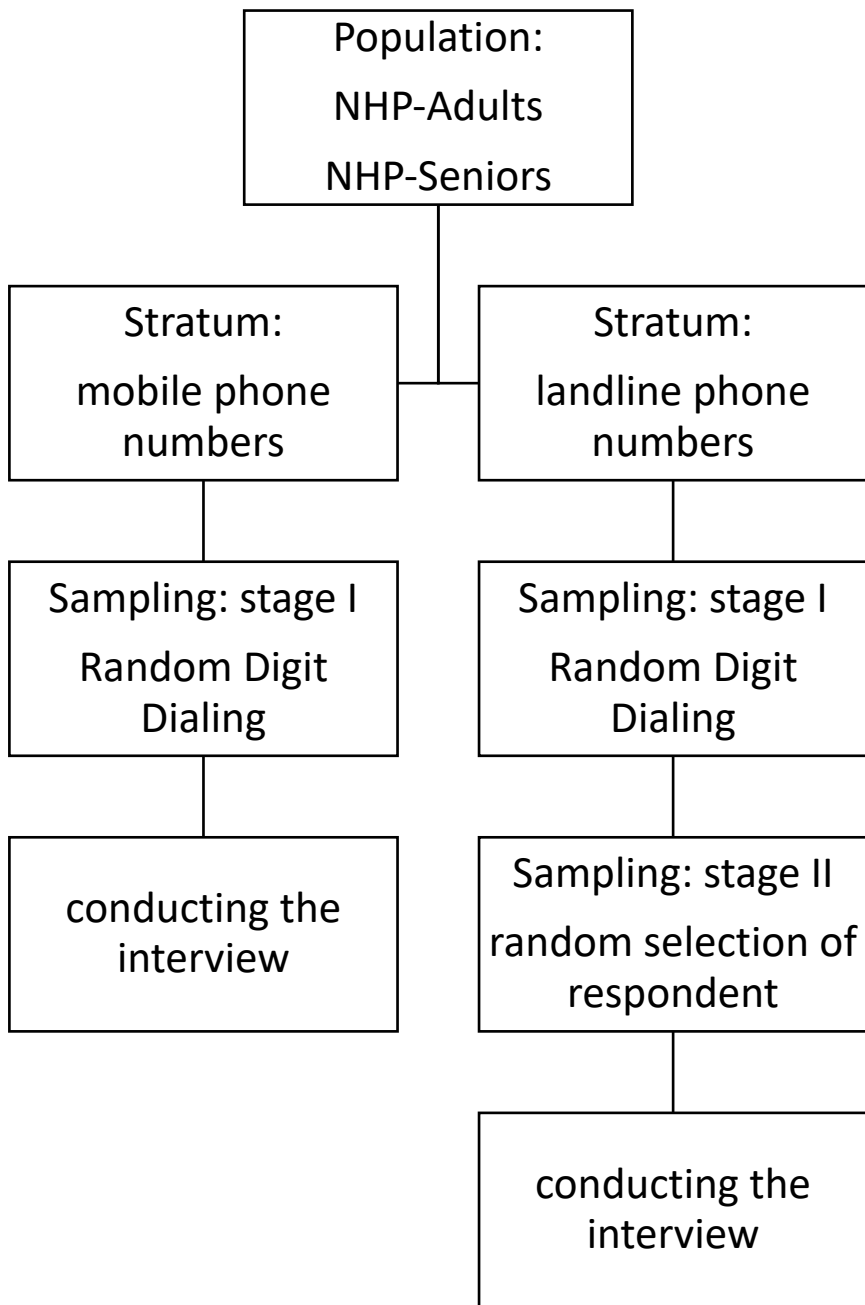

Figure S2: CATI sampling methodology

Supplement: s1 [file s1]
